# Supplementary material
Source: PubMed Central journal article supplement (PMC3090457)
Supplement: NIHMS279533-supplement-2_si_002.pdf [file NIHMS279533-supplement-2_si_002.pdf]

**Supplemental Table 1: Gene-specific primers used in qPCR**

| <b>Gene</b>  | <b>Gene bank #</b> | <b>Sense (5'-3')</b>   | <b>Antisense (5'-3')</b>  |
|--------------|--------------------|------------------------|---------------------------|
| <b>Mmp8</b>  | NM_008611          | ACCTGCAGCAAGGTTACCCCA  | TGTGGTCCACTGAAGAAGAGGAAGA |
| <b>Csf3r</b> | NM_007782          | TCGGGCAGGGTCCACCAACA   | TGGCACGCTGGAGTCCCAGA      |
| <b>Il8rb</b> | NM_009909          | CATGGGGCAGAAGCACCGGG   | GTCATCGCGGCGCTCACAGG      |
| <b>Trem1</b> | NM_021406          | GGCTGACAGAGCGTCCCATCC  | ACCAGGCTCTTGCTGAGAAGTCCA  |
| <b>Lrg1</b>  | NM_029796          | AGGTGAGCGCGCAATGGCTT   | AACAGGACGCGCAGGAACGG      |
| <b>Il1b</b>  | NM_008361          | AAGCCTCGTGCTGTCGGACC   | ACCGTTTTTCCATCTTCTTTGGGT  |
| <b>Fpr1</b>  | NM_013521          | ATCCAGCCGTCCTTTGCGGG   | GGGCCCTCTCTAGGCTGGCA      |
| <b>Fpr2</b>  | NM_008039          | ACCTCAGCTGGTTGTGCAGACA | CCATTGCCCAGCACACCAAGGA    |
| <b>Il1r2</b> | NM_010555          | AGAGGCCGTGTGACCGAGGG   | TGCCAGCGCAATGCTCCAGG      |
| <b>GAPDH</b> | NM_008084          | TGTGTCCGTCGTGGATCTGA   | CCTGCTTCACCACCTTCTTGAT    |
