# Supplementary material
Source: PubMed Central journal article supplement (PMC3090457)

Supplemental Figure 1. Venn diagram of proteins identified from 3 mice.  
Dark: tumor tissue; light: normal tissue.

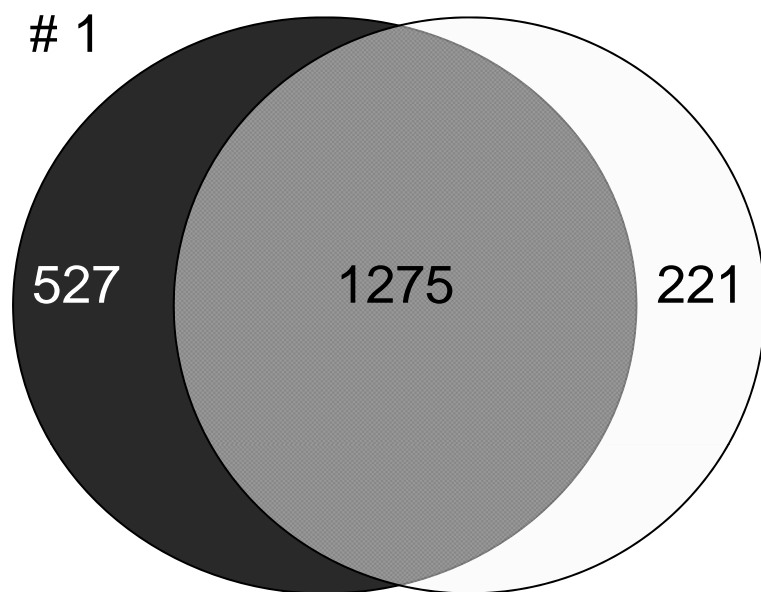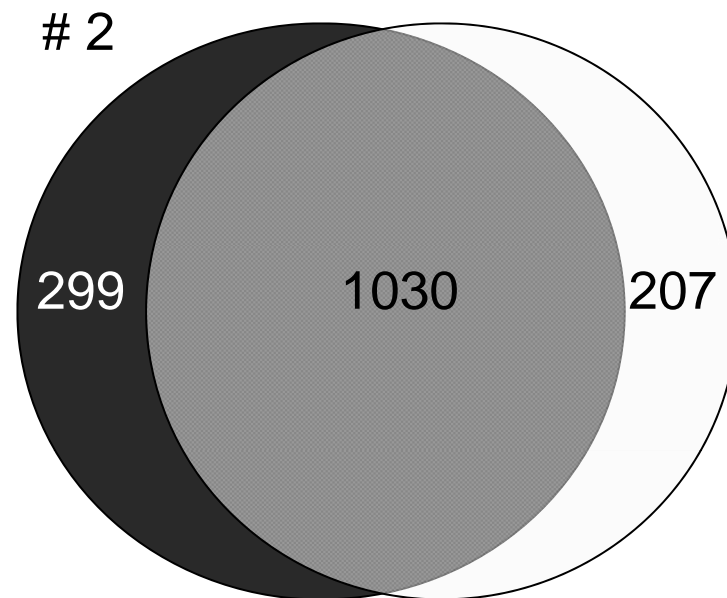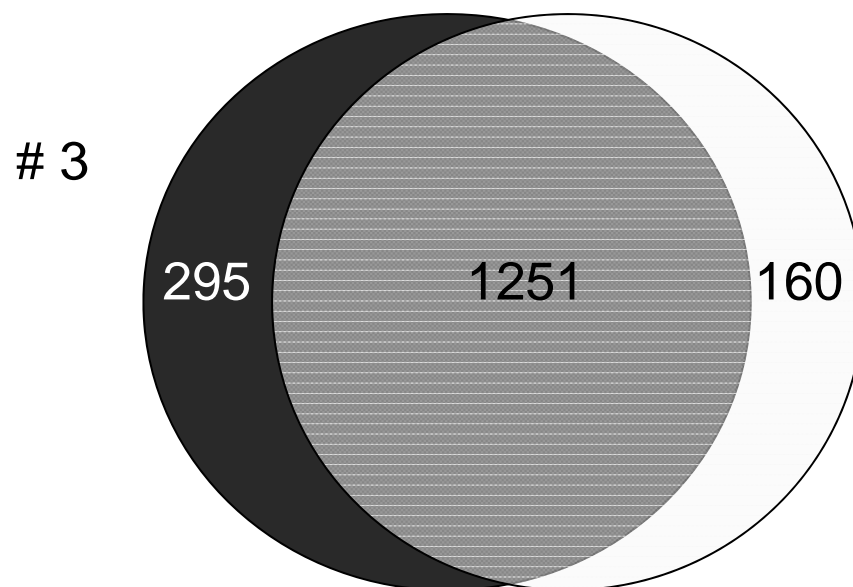

Supplemental Figure 2. Functional categories of identified total proteins. The gene ontologies of the all proteins identified in tumor or adjacent non-tumor tissue was analyzed by DAVID bioinformatics tool. There is no detectable distinction in the assigned functions of the two sets of proteins.

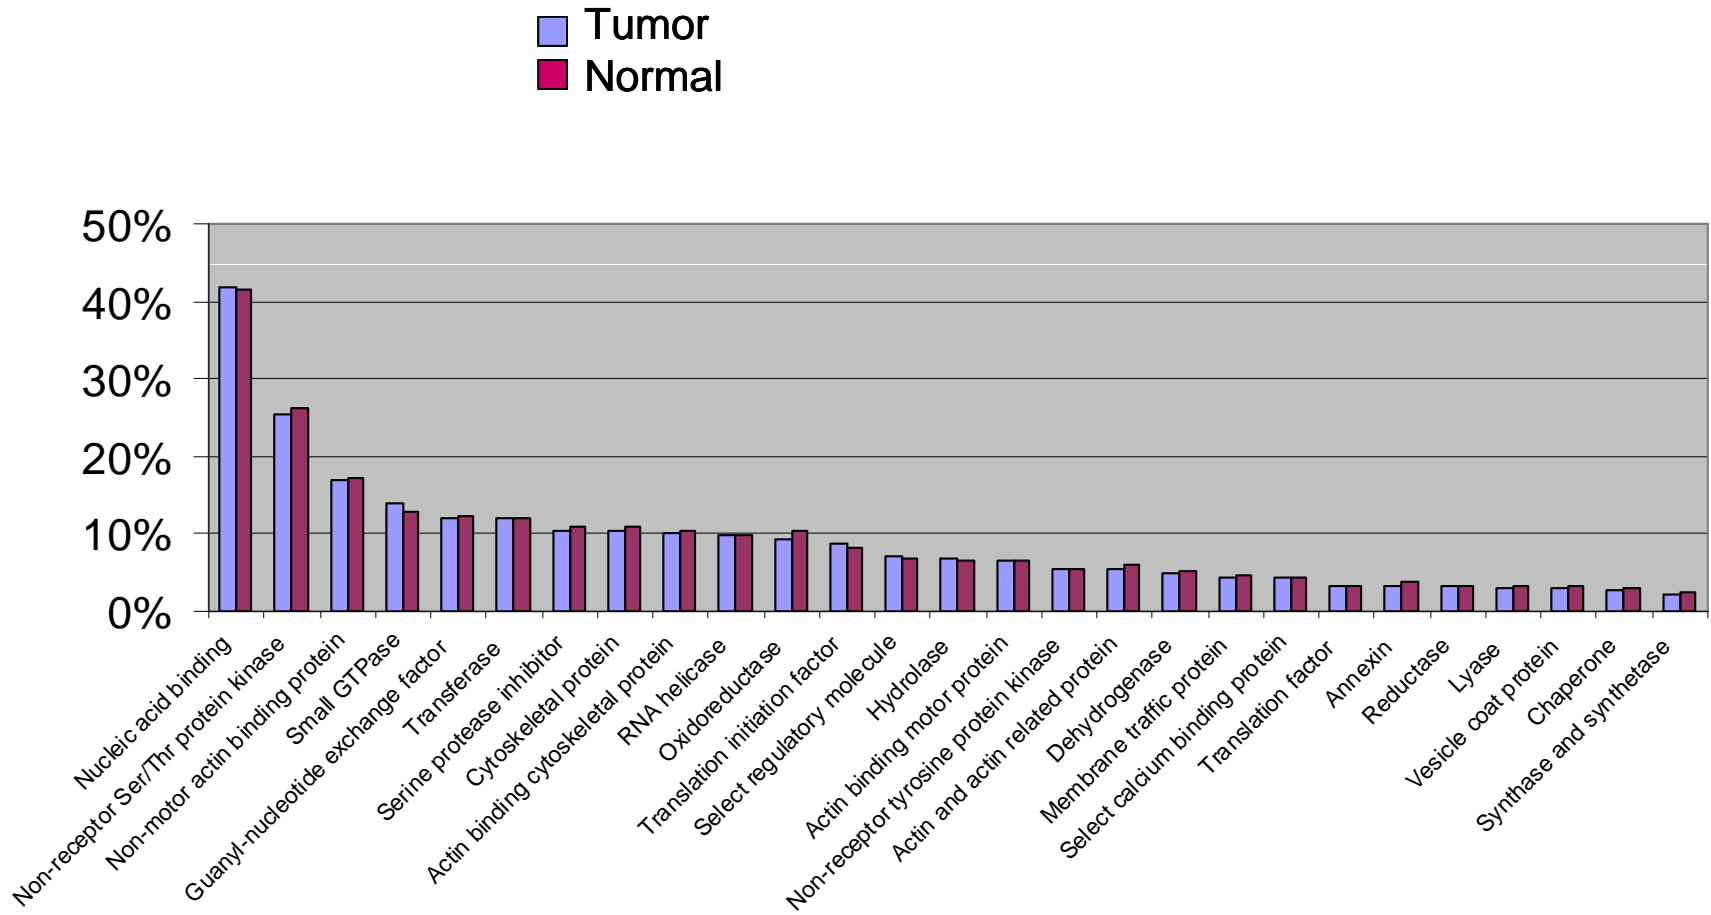

Supplement: NIHMS279533-supplement-3_si_003.pdf [file NIHMS279533-supplement-3_si_003.pdf]
